# Supplementary material for: Top-down and bottom-up controls on an herbivore on a native and introduced plant in a tropical agricultural landscape
Source: PeerJ. 2020 Mar 13;8:e8782. doi: 10.7717/peerj.8782 (PMC7075360; doi:10.7717/peerj.8782)
Supplement: Supplemental Information 3 — Survival rates in the laboratory experiment, each row represents an individual and shows the developmental stage to which it survived. [file peerj-08-8782-s003.csv]

L1	L2	L3	L4	L5	plant
1	1	1	1	0	S myriacanthum
1	1	1	1	0	S myriacanthum
0					S myriacanthum
0					S myriacanthum
0					S myriacanthum
0					S myriacanthum
0					S myriacanthum
0					S myriacanthum
0					S myriacanthum
1	1	1	1	0	S myriacanthum
1	1	1	1	0	S myriacanthum
1	1	1	1	0	S myriacanthum
1	1	1	1	1	S myriacanthum
1	1	1	1	1	S myriacanthum
1	1	1	1	1	S myriacanthum
1	1	1	1	1	S myriacanthum
1	1	1	1	0	S myriacanthum
0					S myriacanthum
0					S myriacanthum
0					S myriacanthum
0					S myriacanthum
0					S myriacanthum
1	1	1	1	0	S myriacanthum
1	1	1	1	1	S myriacanthum
1	1	1	1	1	S myriacanthum
1	1	1	1	1	S myriacanthum
1	1	1	1	1	S myriacanthum
1	1	1	1	1	S myriacanthum
1	1	1	1	1	S myriacanthum
1	1	1	1	1	S myriacanthum
1	1	1	1	1	S myriacanthum
1	1	1	1	1	S myriacanthum
1	1	1	1	1	S myriacanthum
1	1	1	1	1	S myriacanthum
0					S myriacanthum
0					S myriacanthum
0					S myriacanthum
0					S myriacanthum
0					S myriacanthum
0					S myriacanthum
0					S myriacanthum
0					S myriacanthum
0					S myriacanthum
0					S myriacanthum
0					S myriacanthum
0					S myriacanthum
0					S myriacanthum
0					S myriacanthum
1	1	1	1	1	S myriacanthum
0					S myriacanthum
0					S myriacanthum
0					S myriacanthum
0					S myriacanthum
0					S myriacanthum
0					S myriacanthum
0					S myriacanthum
0					S myriacanthum
0					S myriacanthum
0					S myriacanthum
0					S myriacanthum
0					S myriacanthum
0					S myriacanthum
0					S myriacanthum
0					S myriacanthum
0					S myriacanthum
1	1	0			S myriacanthum
1	1	1	0		S myriacanthum
1	1	0			S myriacanthum
1	1	0			S myriacanthum
1	0				S myriacanthum
1	0				S myriacanthum
0					S myriacanthum
0					S myriacanthum
0					S myriacanthum
0					S myriacanthum
0					S myriacanthum
0					S myriacanthum
0					S myriacanthum
0					S myriacanthum
0					S myriacanthum
0					S acerifolium
0					S acerifolium
0					S acerifolium
0					S acerifolium
0					S acerifolium
1	1	1	1	1	S acerifolium
1	1	1	1	1	S acerifolium
1	1	1	1	1	S acerifolium
1	1	1	1	1	S acerifolium
1	1	1	1	1	S acerifolium
0					S acerifolium
0					S acerifolium
0					S acerifolium
1	1	1	0		S acerifolium
1	1	1	1	1	S acerifolium
1	1	1	1	1	S acerifolium
1	1	1	1	0	S acerifolium
1	1	1	1	0	S acerifolium
0					S acerifolium
1	1	1	1	1	S acerifolium
1	1	1	1	1	S acerifolium
1	1	1	1	1	S acerifolium
1	1	1	1	1	S acerifolium
1	1	1	1	1	S acerifolium
1	1	1	1	1	S acerifolium
1	1	1	1	1	S acerifolium
1	1	1	1	1	S acerifolium
1	1	1	1	1	S acerifolium
1	1	1	1	1	S acerifolium
1	1	1	1	1	S acerifolium
1	1	1	1	1	S acerifolium
1	1	1	1	1	S acerifolium
1	1	1	1	1	S acerifolium
1	1	1	1	1	S acerifolium
1	1	1	1	1	S acerifolium
1	1	1	1	1	S acerifolium
1	1	1	1	1	S acerifolium
1	1	1	1	1	S acerifolium
1	1	1	1	1	S acerifolium
1	1	1	1	1	S acerifolium
0					S acerifolium
0					S acerifolium
0					S acerifolium
0					S acerifolium
0					S acerifolium
0					S acerifolium
0					S acerifolium
0					S acerifolium
0					S acerifolium
0					S acerifolium
0					S acerifolium
1	1	0			S acerifolium
1	1	1	1	1	S acerifolium
0					S acerifolium
0					S acerifolium
0					S acerifolium
0					S acerifolium
0					S acerifolium
0					S acerifolium
0					S acerifolium
0					S acerifolium
0					S acerifolium
0					S acerifolium
0					S acerifolium
0					S acerifolium
0					S acerifolium
0					S acerifolium
0					S acerifolium
0					S acerifolium
0					S acerifolium
1	0				S acerifolium
1	0				S acerifolium
1	1	1	1	1	S acerifolium
1	1	1	1	0	S acerifolium
1	1	1	0		S acerifolium
1	1	1	1	0	S acerifolium
1	1	0			S acerifolium
1	1	1	1	0	S acerifolium
1	1	1	1	0	S acerifolium
1	1	1	1	1	S acerifolium
0					S candidum
0					S candidum
0					S candidum
0					S candidum
0					S candidum
0					S candidum
0					S candidum
0					S candidum
0					S candidum
0					S candidum
0					S candidum
0					S candidum
0					S candidum
0					S candidum
0					S candidum
0					S candidum
0					S candidum
0					S candidum
0					S candidum
0					S candidum
